# Supplementary material for: Toward Tumor Fight and Tumor Microenvironment Remodeling: PBA Induces Cell Cycle Arrest and Reduces Tumor Hybrid Cells’ Pluripotency in Bladder Cancer
Source: MDPI journal article supplement (doi:10.3390/cancers14020287), 2022-01-07
Supplement: s1 [file s1]

# Supplementary Materials: Toward Tumor Fight and Tumor Microenvironment Remodeling: PBA Induces Cell Cycle Arrest and Reduces Tumor Hybrid Cells' Pluripotency in Bladder Cancer

Carolina Rubio, José Avendaño-Ortiz, Raquel Ruiz-Palomares, Viktoriya Karaivanova, Omaira Alberquilla, Rebeca Sánchez-Domínguez, José Carlos Casavilla-Dueñas, Karla Montalbán-Hernández, Iris Lodewijk, Marta Rodríguez-Izquierdo, Ester Munera-Maravilla, Sandra P. Nunes, Cristian Suárez-Cabrera, Miriam Pérez-Crespo, Víctor G. Martínez, Lucía Morales, Mercedes Pérez-Escavy, Miguel Alonso-Sánchez, Roberto Lozano-Rodríguez, Francisco J. Cueto, Luis A. Aguirre, Félix Guerrero-Ramos, Jesús M. Paramio, Eduardo López-Collazo and Marta Dueñas

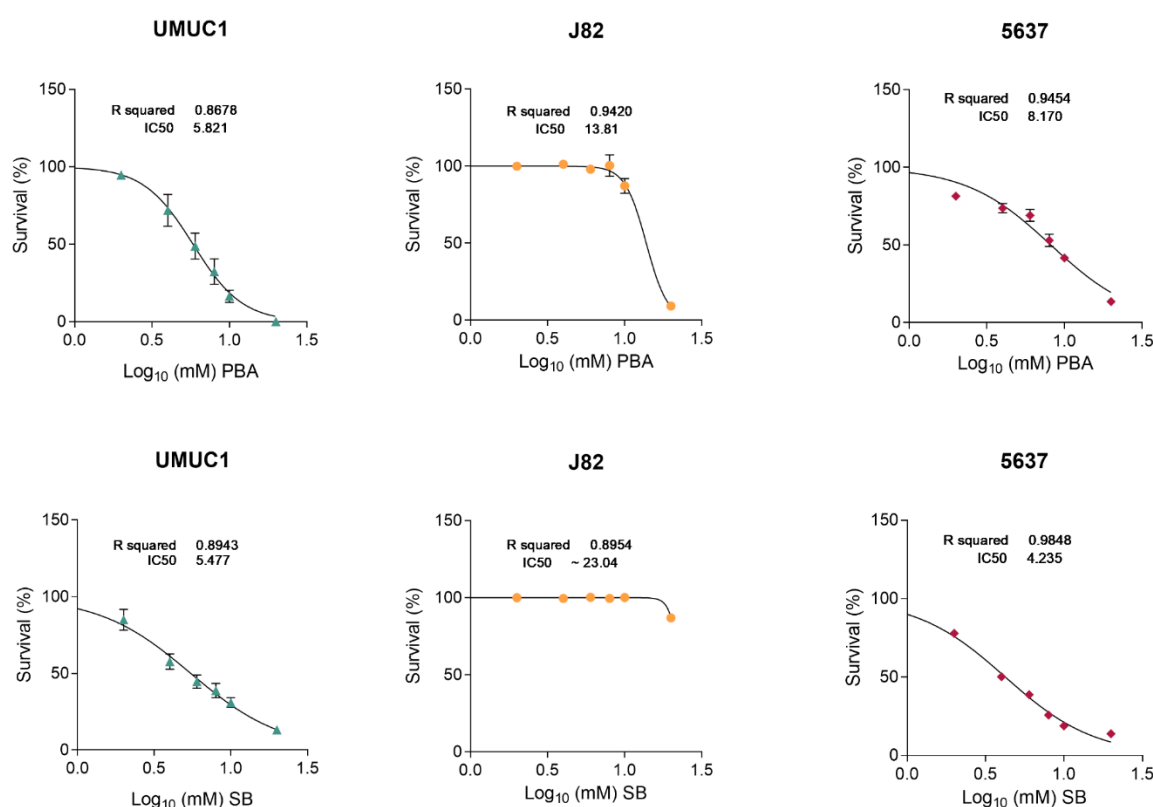

**Figure S1.** Summary of sensitivity assays of UMUC1, 5637 and J82 BC cells to PBA and SB. Data come from 5 independent experiments for each cell line and are shown as mean  $\pm$  SEM for different concentrations of the compounds.

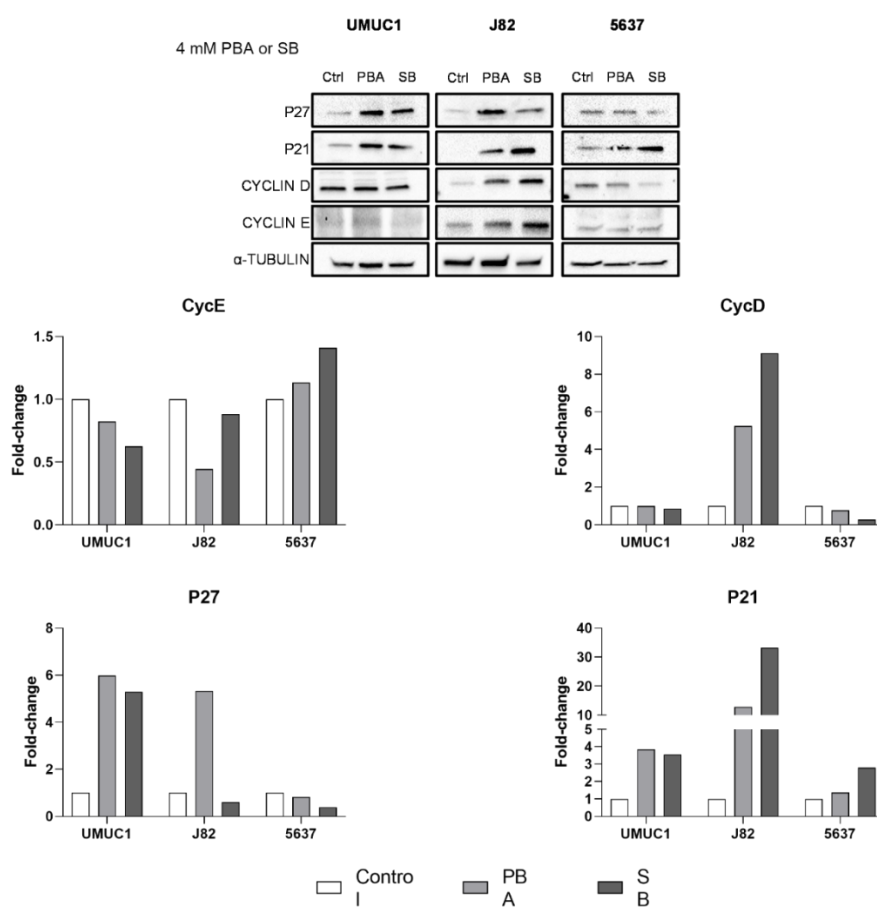

**Figure S2.** Expression of cell cycle related proteins in UMUC1, J82 and 5637 BC cells without treatment (Ctrl) and after treatment with PBA and SB. Quantification levels of all marks in the same cells is shown,  $\alpha$ -TUBULIN was used for loading normalization.

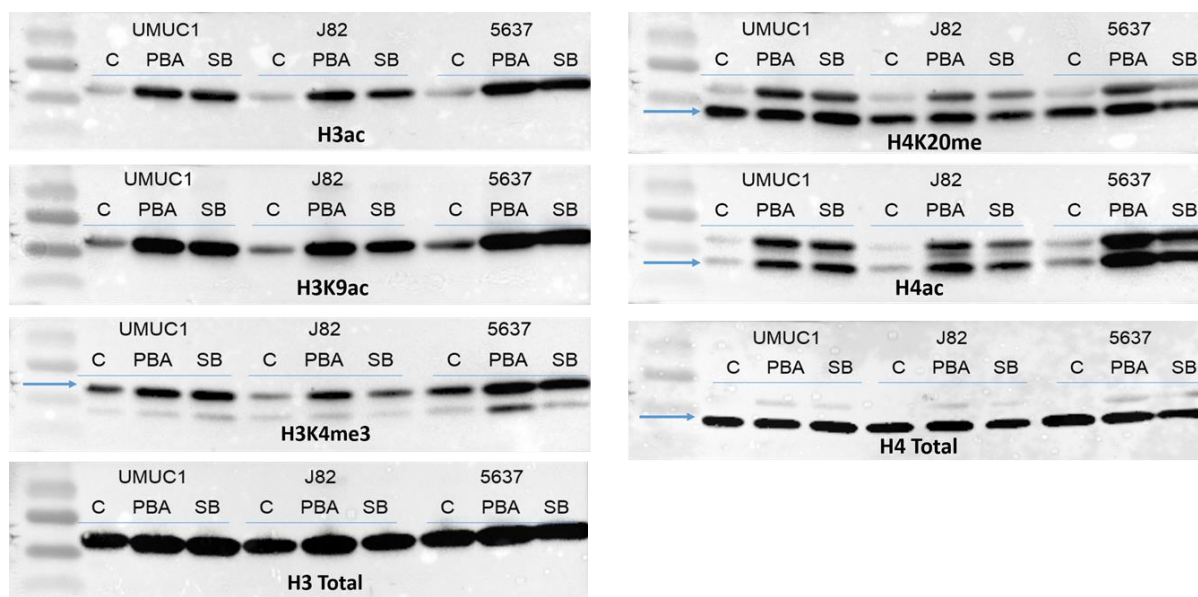

**Figure S3.** Original Western blots images.

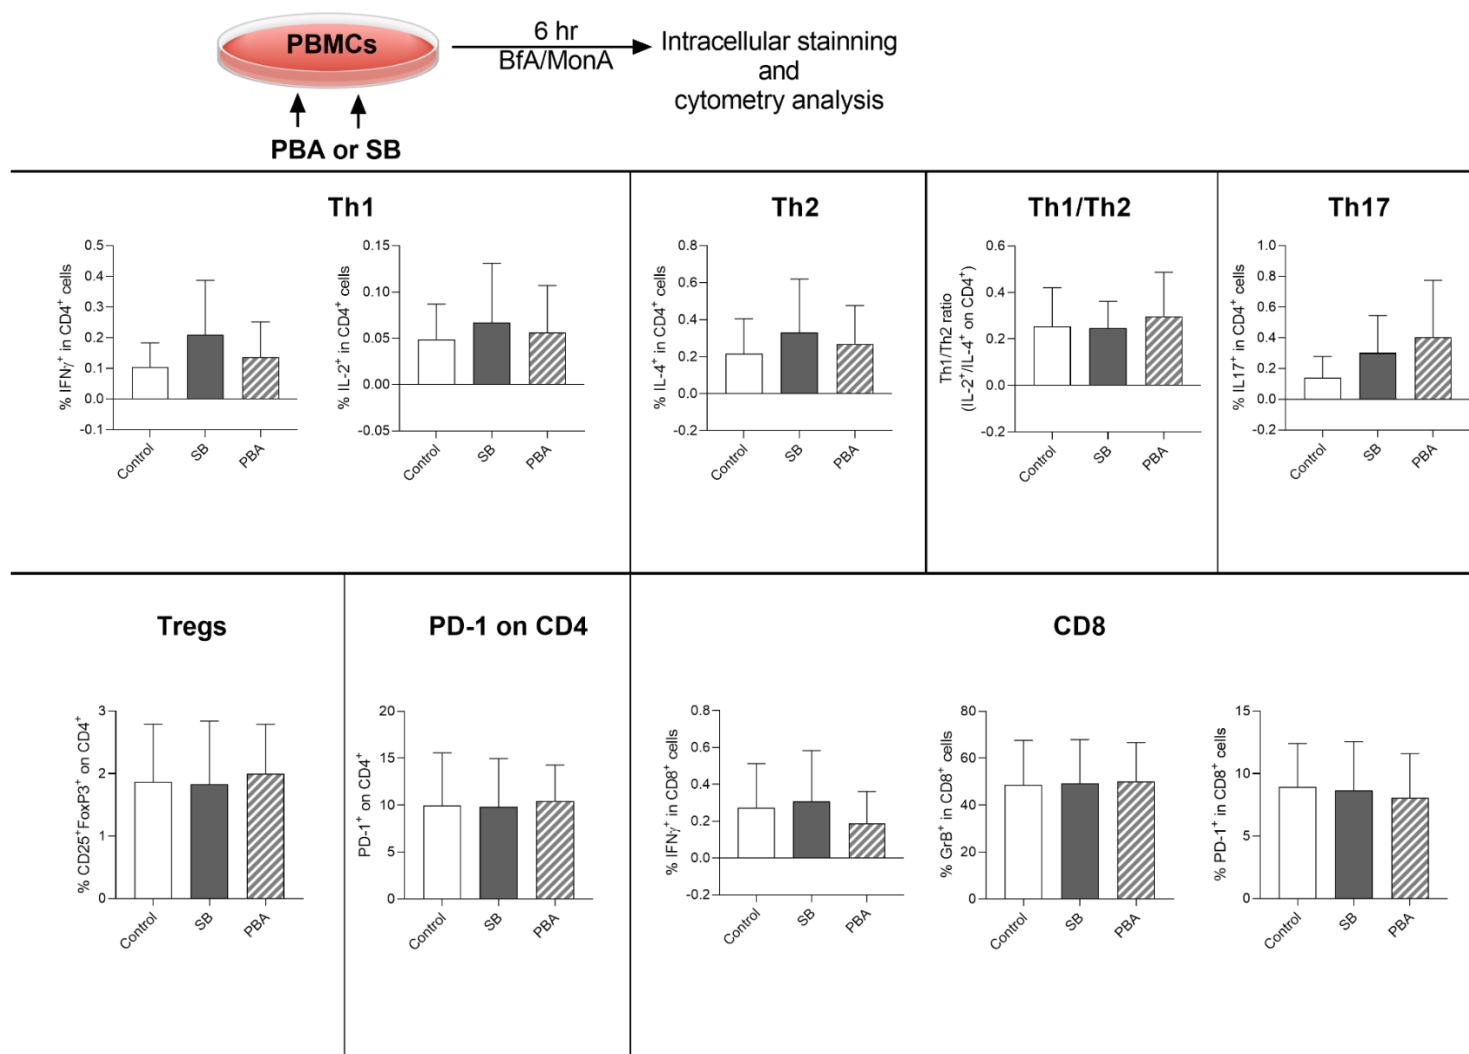

**Figure S4.** Cytokine expression profiles of PBMC treated with PBA and SB. Brefeldin A and Monensin were used to enhance cytokine detection.

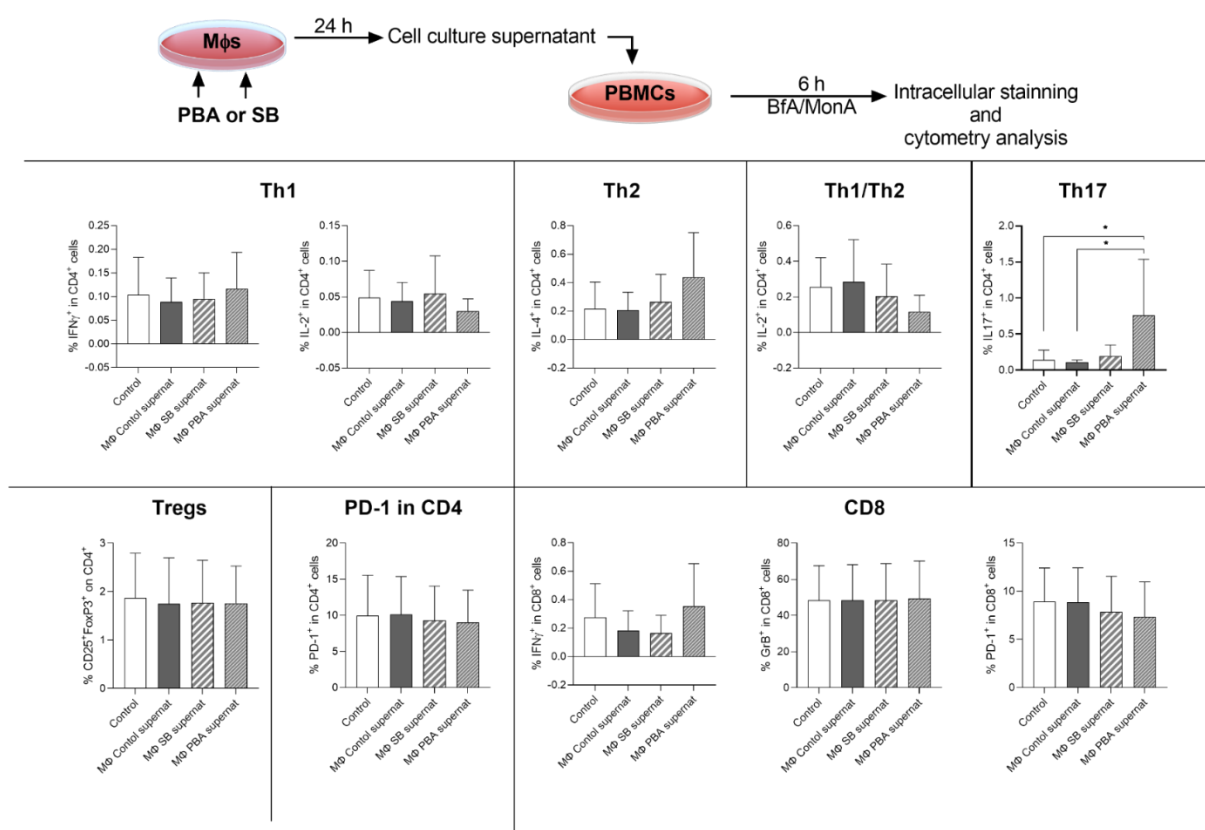

**Figure S5.** Cytokine expression profiles of PBMC stimulation with conditioned medium from macrophage treated with PBA and SB. Brefeldin A and Monensin were used to enhance cytokine detection.

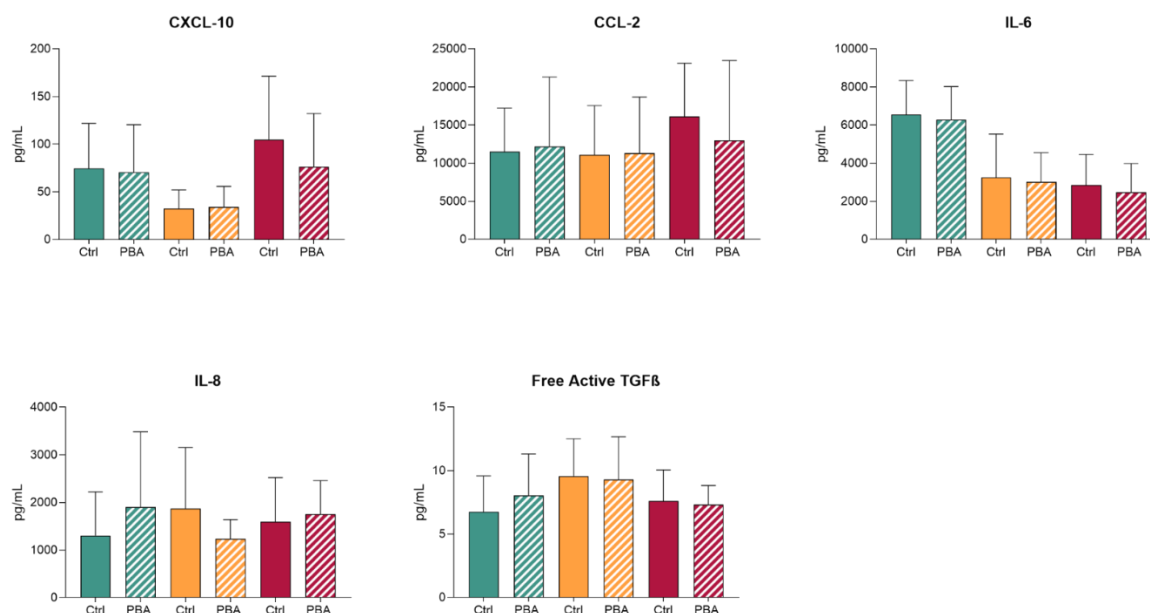

**Figure S6.** Evaluation of cytokine expression profiles characteristic for M1 or M2 macrophage polarization in co-culture supernatants. CXCL10, CCL2, IL-6, IL-8 and free active TGF $\beta$  cytokine expression profiles are shown for single-culture and co-culture supernatants, Supernatants of macrophages and BC cell single cultures were included as a control.

**Table S1.** Antibodies employed in the present study.

| Antibodies for Western Blot                                                                              |           |                              |                                            |          |
|----------------------------------------------------------------------------------------------------------|-----------|------------------------------|--------------------------------------------|----------|
| Target                                                                                                   | Clone     | Source                       | Dilution                                   |          |
| Acetyl-Histone H3 (Lys9)                                                                                 |           | Cell Signaling #9649         | 1:1000                                     |          |
| H4K20me                                                                                                  |           | Abcam9051                    | 1:1000                                     |          |
| H3K4me3                                                                                                  |           | Abcam 8580                   | 1:1000                                     |          |
| Acetyl-H3                                                                                                | -         | Millipore 06-599             | 1:1000                                     |          |
| H3                                                                                                       | 96C10     | Cell Signaling #3638         | 1:10000                                    |          |
| Acetyl-H4                                                                                                | -         | Millipore 06-598             | 1:100                                      |          |
| H4                                                                                                       | 62-141-13 | Millipore 05-858             | 1:1000                                     |          |
| p27                                                                                                      | -         | Abcam ab7961                 | 1:500                                      |          |
| p21                                                                                                      | F-5       | Santa Cruz sc-6246           | 1:500                                      |          |
| Cyclin D1                                                                                                | H-295     | Santa cruz sc-753            | 1:200                                      |          |
| Cyclin E                                                                                                 | -         | Upstate biotechnology 06-134 | 1:500                                      |          |
| $\alpha$ -Tubulin                                                                                        | FL-335    | Sigma T5168                  | 1:1000                                     |          |
| Secondary antibody for Western Blot                                                                      |           |                              |                                            |          |
| Target                                                                                                   | Clone     | Conjugated                   | Source                                     | Dilution |
| Anti-Rabbit IgG                                                                                          | Donkey    | HRP                          | GE Healthcare NA934                        | 1:5000   |
| Anti-Mouse IgG                                                                                           | Donkey    | HRP                          | JACKSON N° 715-035-151                     | 1:5000   |
| Antibodies for Flow Cytometry                                                                            |           |                              |                                            |          |
| Target                                                                                                   | Clone     | Source                       | Dilution                                   |          |
| CD11b                                                                                                    | -         | Beckman Coulter IM0530       | 1 $\mu$ l per million cells in 100 $\mu$ l |          |
| EpCAM                                                                                                    | 9C4       | BioLegend 324208             | 5 $\mu$ l per million cells in 100 $\mu$ l |          |
| List of antibodies for extracellular and intracellular staining for T cell stimulation by Flow Cytometry |           |                              |                                            |          |
| Target                                                                                                   | Clone     | Source                       | Fluorochrome                               |          |
| Extracellular markers                                                                                    |           |                              |                                            |          |
| CD3                                                                                                      | UCHT1     | Biolegend 300436             | BV570                                      |          |
| CD4                                                                                                      | SK3       | Biolegend 344608             | PerCP/Cy5.5                                |          |
| CD8                                                                                                      | SK1       | BD biosciences 612889        | BUV805                                     |          |
| CD25                                                                                                     | 2A3       | BD biosciences 347643        | FITC                                       |          |
| PD-1                                                                                                     | EH12.2H7  | Biolegend 329929             | BV785                                      |          |
| Intracellular markers                                                                                    |           |                              |                                            |          |
| Granzyme B                                                                                               | QA16A02   | Biolegend 372214             | PE/Cy7                                     |          |
| IFN $\gamma$                                                                                             | 4S.B3     | Biolegend 502540             | BV711                                      |          |
| FoxP3                                                                                                    | 236A/E7   | BD biosciences 563955        | PE-Dazzle594                               |          |
| IL-2                                                                                                     | MQ1-17H12 | BD biosciences 565136        | APC-R700                                   |          |
| IL-17                                                                                                    | SCPL1362  | BD biosciences 560439        | Alexa Fluor 647                            |          |
| IL-4                                                                                                     | MP4-25D2  | BD biosciences 566274        | BV421                                      |          |
| TNF $\alpha$                                                                                             | MAb11     | BD biosciences 563418        | BV650                                      |          |

**Table S2.** Primer sequences for RT-qPCR.

| Primer name            | Sequence 5' -> 3'            |
|------------------------|------------------------------|
| <i>TBP-F</i>           | AGTGAAGAACAGTCCAGACTG        |
| <i>TBP-R</i>           | CCAGGAAATAACTCTGGCTCAT       |
| <i>TBP-RT</i>          | TGCCTTTGTTGCTCTT             |
| <i>CDK1NA(p21)-F</i>   | CCTCATCCCGTGTCTCCTTT         |
| <i>CDK1NA(p21)-R</i>   | ACTTGTCGCTGGGTGGTAC          |
| <i>CDK1NA(p21)-RT</i>  | GGTGAATTCATAACCG             |
| <i>CDKN1B (p27)-F</i>  | CGCTTTGTTTTGTTGCGTTT         |
| <i>CDKN1B (p27)-R</i>  | CACTCGCACGTTTGACATCT         |
| <i>CDKN1B (p27)-RT</i> | GTCCCGGGTTAACTCTTCGT         |
| <i>MYC-F</i>           | AATGAAAAGGCCCCCAAGGTAGTTATCC |
| <i>MYC-R</i>           | GTCGTTTCCGCAACAAGTCCTCTTC    |
| <i>MYC-RT</i>          | GTTAGAAGGAATCG               |
| <i>E2F1-F</i>          | TCCAAGAACCACATCCAGTG         |
| <i>E2F1-R</i>          | CTGGGTCAACCCCTCAAG           |
| <i>E2F1-RT</i>         | GTATAAATTAAATGTTTCCA         |
| <i>BMP4-F</i>          | TCCACAGCACTG GTCTTG          |
| <i>BMP4-R</i>          | TGGGATGTTCTCCAGATG           |
| <i>BMP4-RT</i>         | GGG TG TGCTGAGGTTA           |
| <i>PD-L1-F</i>         | CCATACAGCTGAATTGGTCATC       |
| <i>PD-L1-R</i>         | CAGAATTACCAAGTGAGTCCTTTCA    |
| <i>PD-L1-RT</i>        | GTCTCCTCCAAA                 |
| <i>TLR4-F</i>          | CCTGCGTGAGACCAGAAAG          |
| <i>TLR4-R</i>          | TTCAGCTCCATGCATTGATAA        |
| <i>TLR4-RT</i>         | TGTCAATATTAAGGTAGAGA         |
| <i>BMPR-2-F</i>        | TCTGGATCTTTCAGCCACAA         |
| <i>BMPR-2-R</i>        | TGCCATCTTGTTGACTCAC          |
| <i>BMPR-2-RT</i>       | AGTGGAGATGACCC               |
| <i>SOX2-F</i>          | CGGAGGAGAAGGAAAGTCG          |
| <i>SOX2-R</i>          | CCAGCAAACCTCCAGCAGAC         |
| <i>SOX2-RT</i>         | GCT TGGAGACTAGC              |
| <i>NANOG-F</i>         | ACCTTCCAATGTGGAGCAAC         |
| <i>NANOG-R</i>         | ACTGGATGTTCTGGGTCTGG         |
| <i>NANOG-RT</i>        | GTTGGTCAGCACAGGAGAAAATGCC    |
| <i>IL-10-F</i>         | GATGCCTTCAGCAGAGTGAA         |
| <i>IL-10-R</i>         | GCAACCCAGGTAACCCTTAAA        |
| <i>IL-10-RT</i>        | GTCTGGGTCTT                  |
|                        | GTCTGGGTCTT                  |
